# Supplementary material for: A simple terephthalaldehyde-based AIE fluorescent probe for highly sensitive and selective detection of bisulphites in food samples
Source: Royal Society of Chemistry journal article supplement (doi:10.1039/d5ay00008d), 2025-01-01
Supplement: d5ay00008d1.pdf [file d5ay00008d1.pdf]

Supporting Information

**A simple terephthalaldehyde-based AIE fluorescent probe  
for highly sensitive and selective detection of bisulfites in food  
samples**

Wanmeng Li<sup>a</sup>, Lingxiao Xiong<sup>a</sup>, Bo Wang<sup>b,\*</sup>, Guodong Feng<sup>a,\*</sup>

<sup>a</sup> College of Chemistry, Jilin University, Changchun, Jilin, 130021, China

<sup>b</sup> State key Laboratory of Supramolecular Structure and Materials, Jilin University, Changchun, Jilin  
130012, China

## Table of contents

|                                                                                                                                                                                                                                                                                                       |    |
|-------------------------------------------------------------------------------------------------------------------------------------------------------------------------------------------------------------------------------------------------------------------------------------------------------|----|
| <b>Characterization of FPB</b> .....                                                                                                                                                                                                                                                                  | S3 |
| <b>Fig. S1</b> <sup>1</sup> H NMR of FPB in CDCl <sub>3</sub> .....                                                                                                                                                                                                                                   | S3 |
| <b>Fig. S2</b> <sup>13</sup> C NMR of FPB in CDCl <sub>3</sub> .....                                                                                                                                                                                                                                  | S3 |
| <b>Spectra data</b> .....                                                                                                                                                                                                                                                                             | S4 |
| <b>Fig. S3</b> Absorbance spectra of FPB (30 μM) in DMSO. ....                                                                                                                                                                                                                                        | S4 |
| <b>Fig. S4</b> The fluorescent excitation and emission spectra of FPB (10 μM) in DMSO solution, λ <sub>ex</sub> =405 nm. ....                                                                                                                                                                         | S4 |
| <b>Fig. S5</b> The average diameter of FPB (10 μM) or FPB (10 μM) with HSO <sub>3</sub> <sup>-</sup> (5 μM) in BR solution. ....                                                                                                                                                                      | S5 |
| <b>Fig. S6</b> Fluorescent lifetime of FPB (10 μM) in DMSO solution .....                                                                                                                                                                                                                             | S5 |
| <b>Fig. S7</b> Fluorescent lifetime of FPB (10 μM) in BR butter solution (pH = 6) .....                                                                                                                                                                                                               | S6 |
| <b>Fig. S8</b> (A) <sup>1</sup> H NMR of FPB in <i>d</i> -DMSO;(B) <sup>1</sup> H NMR of FPB in the presence of HSO <sub>3</sub> <sup>-</sup> in <i>d</i> -DMSO and D <sub>2</sub> O. ....                                                                                                            | S6 |
| <b>Fig. S9</b> Spectrophotometric standard curve of SO <sub>2</sub> standard solution (0, 2.5, 5.0, 10.0, 20.0, 30.0 μg),according to GB 5009.34-2022. ....                                                                                                                                           | S7 |
| <b>Fig. S10</b> The fluorescence emission intensity of FPB with or without HSO <sub>3</sub> <sup>-</sup> in different buffer solutions (BR: Britton-Robison buffer solution; PBS: Phosphate buffer saline; PB: Phosphate buffer; HEPES: 2-[4-(2-hydroxyethyl)piperazin-1-yl]ethanesulfonic acid)..... | S7 |
| <b>Structural parameters for single crystals of FPB</b> .....                                                                                                                                                                                                                                         | S8 |
| <b>Table S1</b> Crystal data and structure refinement for FPB .....                                                                                                                                                                                                                                   | S8 |
| <b>Table S2</b> Bond lengths [Å] for FPB.....                                                                                                                                                                                                                                                         | S8 |
| <b>Table S3</b> Bond angles [°] for FPB .....                                                                                                                                                                                                                                                         | S9 |
| <b>Table S4</b> Hydrogen bonds for FPB [A and deg.].....                                                                                                                                                                                                                                              | S9 |

# Characterization of FPB

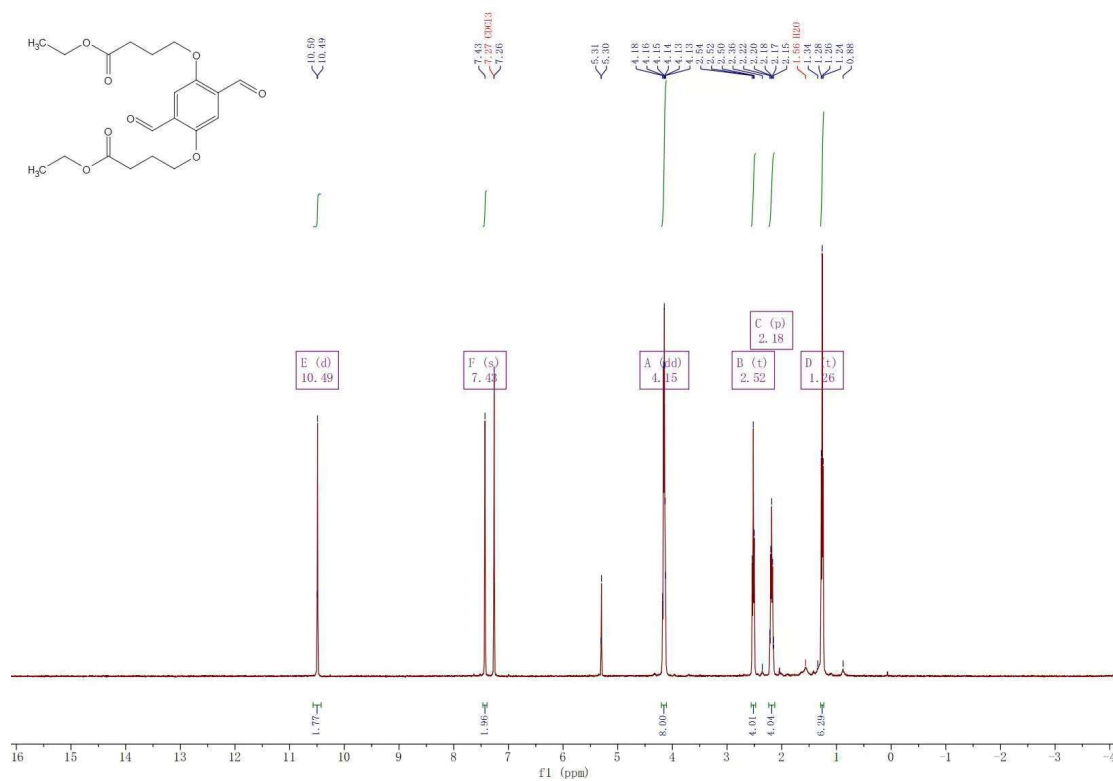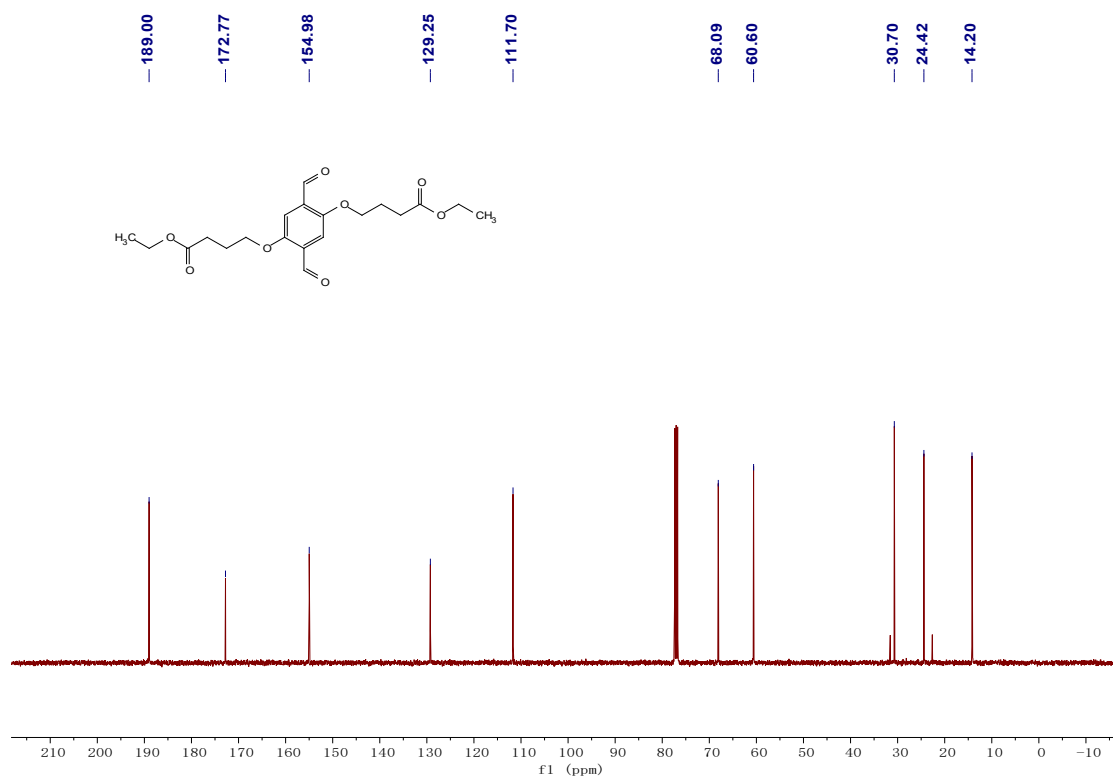

## Spectra data

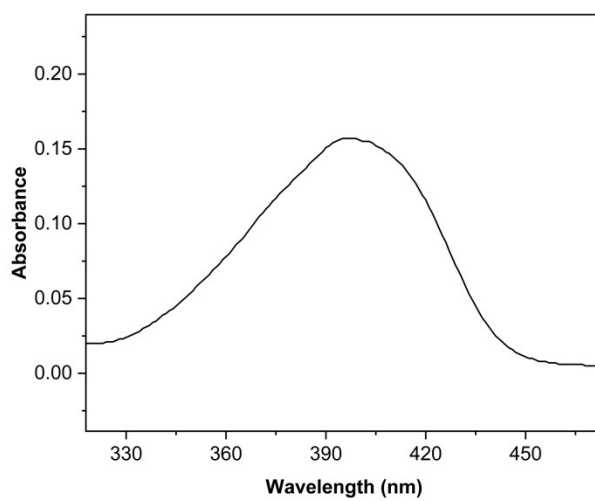

**Fig. S3** Absorbance spectra of FPB (30 μM) in DMSO.

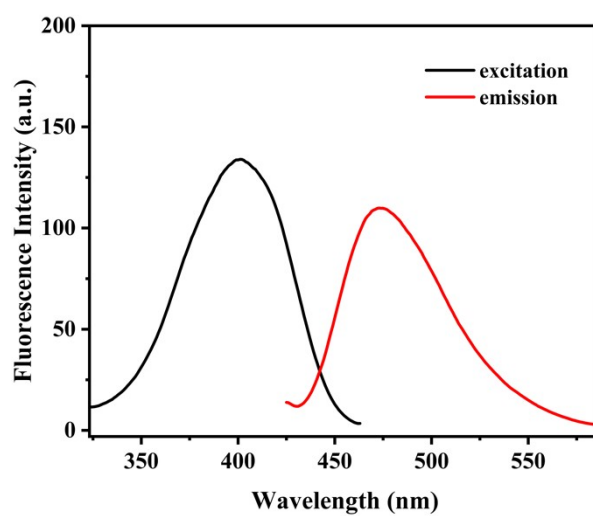

**Fig. S4** The fluorescent excitation and emission spectra of FPB (10 μM) in DMSO solution,  $\lambda_{ex}$  =405 nm.

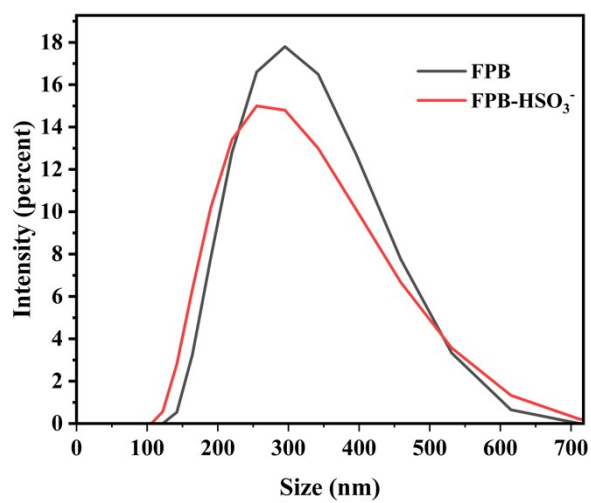

**Fig. S5** The average diameter of FPB (10  $\mu$ M) or FPB (10  $\mu$ M) with HSO<sub>3</sub><sup>-</sup> (5  $\mu$ M) in BR solution.

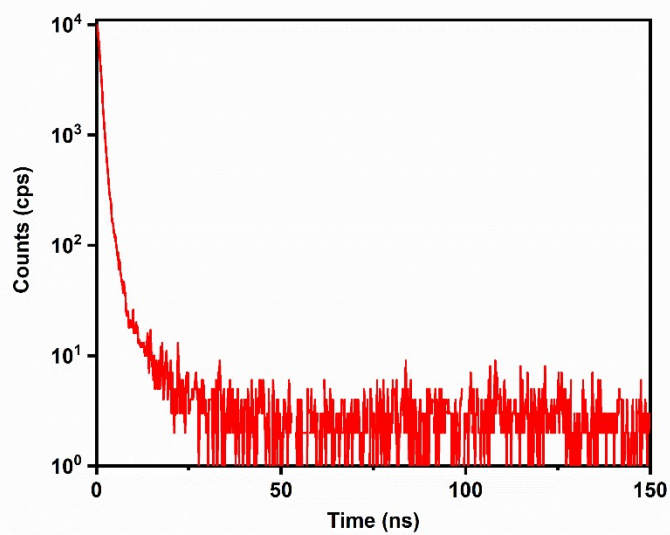

**Fig. S6** Fluorescent lifetime of FPB (10  $\mu$ M) in DMSO solution

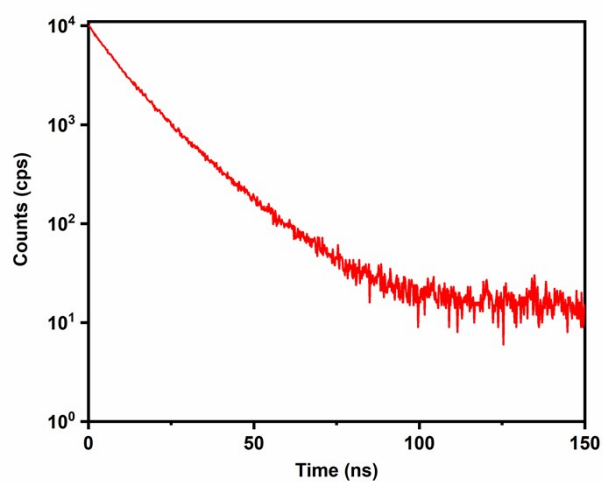

**Fig. S7** Fluorescent lifetime of FPB (10  $\mu$ M) in BR butter solution (pH = 6)

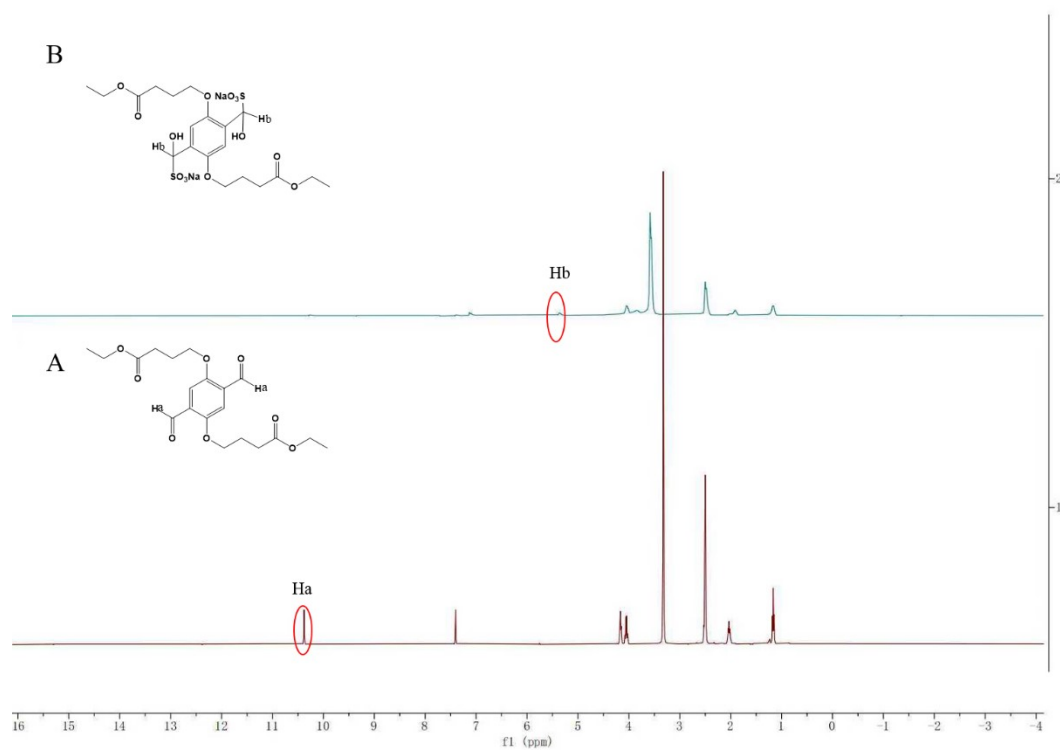

**Fig. S8** (A)  $^1\text{H}$  NMR of FPB in *d*-DMSO; (B)  $^1\text{H}$  NMR of FPB in the presence of  $\text{HSO}_3^-$  in *d*-DMSO and  $\text{D}_2\text{O}$ .

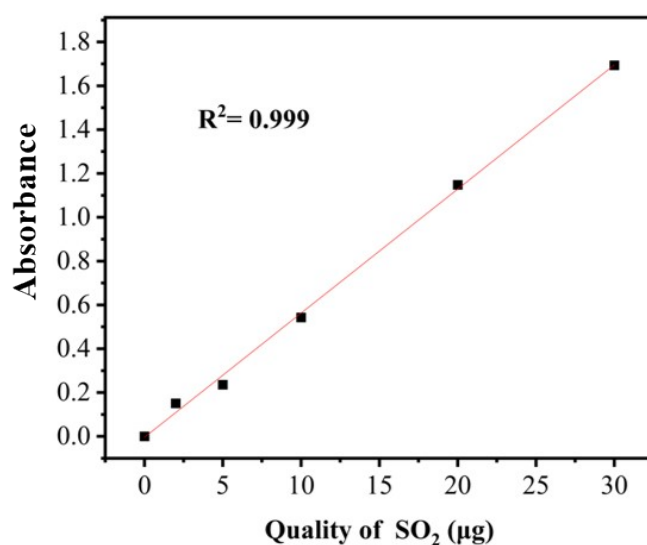

**Fig. S9** Spectrophotometric standard curve of SO<sub>2</sub> standard solution (0, 2.5, 5.0, 10.0, 20.0, 30.0 µg), according to GB 5009.34-2022.

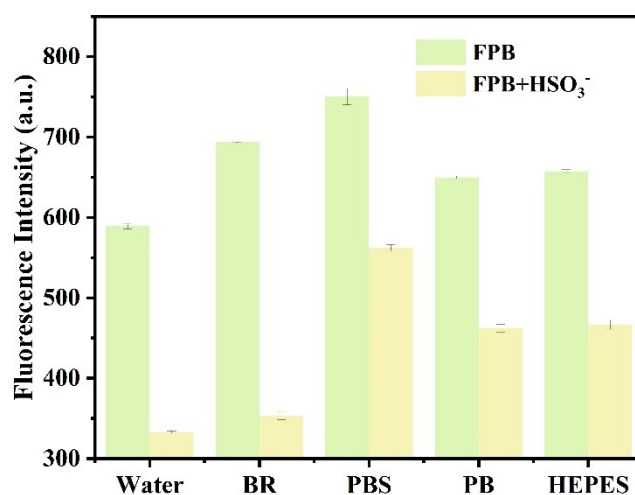

**Fig. S10** The fluorescence emission intensity of FPB with or without HSO<sub>3</sub><sup>-</sup> in different buffer solutions (BR: Britton-Robison buffer solution; PBS: Phosphate buffer saline; PB: Phosphate buffer; HEPES: 2-[4-(2-hydroxyethyl)piperazin-1-yl]ethanesulfonic acid).

## Structural parameters for single crystals of FPB

**Table S1** Crystal data and structure refinement for FPB

| Phase data         |                                                                                                                                      |
|--------------------|--------------------------------------------------------------------------------------------------------------------------------------|
| Identification     | FPB                                                                                                                                  |
| CCDC NO.           | 2397701                                                                                                                              |
| Empirical formula  | C <sub>20</sub> H <sub>26</sub> O <sub>8</sub>                                                                                       |
| Formula weight     | 394.41                                                                                                                               |
| Crystal system,    | Triclinic,                                                                                                                           |
| Space group        | P-1                                                                                                                                  |
| Cell dimensions    | a = 4.7164(4) Å    alpha = 76.335(2) deg.<br>b = 10.1972(8) Å    beta = 84.552(3) deg.<br>c = 10.9556(7) Å    gamma = 77.787(3) deg. |
| Calculated density | 11.310 mg/m <sup>3</sup>                                                                                                             |
| Crystal size       | 0.24 x 0.21 x 0.17 mm                                                                                                                |

**Table S2** Bond lengths [Å] for FPB

| Atoms 1,2   | d 1,2 [Å]  | Atoms 1,2   | d 1,2 [Å] |
|-------------|------------|-------------|-----------|
| O(1)-C(1)   | 1.364(2)   | C(5)-C(6)   | 1.515(3)  |
| O(1)-C(4)   | 1.4404(19) | C(5)-H(5A)  | 0.9700    |
| O(2)-C(7)   | 1.333(2)   | C(5)-H(5B)  | 0.9700    |
| O(2)-C(8)   | 1.455(2)   | C(6)-C(7)   | 1.501(2)  |
| O(3)-C(7)   | 1.198(2)   | C(6)-H(6A)  | 0.9700    |
| O(4)-C(10)  | 1.193(2)   | C(6)-H(6B)  | 0.9700    |
| C(1)-C(2)   | 1.383(2)   | C(8)-C(9)   | 1.484(3)  |
| C(1)-C(3)#1 | 1.405(2)   | C(8)-H(8A)  | 0.9700    |
| C(2)-C(3)   | 1.389(2)   | C(8)-H(8B)  | 0.9700    |
| C(2)-H(2)   | 0.9300     | C(9)-H(9A)  | 0.9600    |
| C(3)-C(10)  | 1.475(2)   | C(9)-H(9B)  | 0.9600    |
| C(4)-C(5)   | 1.506(2)   | C(9)-H(9C)  | 0.9600    |
| C(4)-H(4A)  | 0.9700     | C(10)-H(10) | 0.9300    |
| C(4)-H(4B)  | 0.9700     |             |           |



**Table S3** Bond angles [°] for FPB

| Atoms 1,2,3       | Angle 1,2,3 [°] | Atoms 1,2,3      | Angle 1,2,3 [°] |
|-------------------|-----------------|------------------|-----------------|
| C(1)-O(1)-C(4)    | 119.24(13)      | C(7)-C(6)-H(6A)  | 108.8           |
| C(7)-O(2)-C(8)    | 116.51(14)      | C(5)-C(6)-H(6A)  | 108.8           |
| O(1)-C(1)-C(2)    | 124.94(15)      | C(7)-C(6)-H(6B)  | 108.8           |
| O(1)-C(1)-C(3)#1  | 115.82(15)      | C(5)-C(6)-H(6B)  | 108.8           |
| C(2)-C(1)-C(3)#1  | 119.24(15)      | H(6A)-C(6)-H(6B) | 107.7           |
| C(1)-C(2)-C(3)    | 120.18(15)      | O(3)-C(7)-O(2)   | 123.23(17)      |
| C(1)-C(2)-H(2)    | 119.9           | O(3)-C(7)-C(6)   | 125.40(17)      |
| C(3)-C(2)-H(2)    | 119.9           | O(2)-C(7)-C(6)   | 111.37(15)      |
| C(2)-C(3)-C(1)#1  | 120.58(15)      | O(2)-C(8)-C(9)   | 107.43(17)      |
| C(2)-C(3)-C(10)   | 119.26(15)      | O(2)-C(8)-H(8A)  | 110.2           |
| C(1)#1-C(3)-C(10) | 120.14(15)      | C(9)-C(8)-H(8A)  | 110.2           |
| O(1)-C(4)-C(5)    | 105.91(14)      | O(2)-C(8)-H(8B)  | 110.2           |
| O(1)-C(4)-H(4A)   | 110.6           | C(9)-C(8)-H(8B)  | 110.2           |
| C(5)-C(4)-H(4A)   | 110.6           | H(8A)-C(8)-H(8B) | 108.5           |
| O(1)-C(4)-H(4B)   | 110.6           | C(8)-C(9)-H(9A)  | 109.5           |
| C(5)-C(4)-H(4B)   | 110.6           | C(8)-C(9)-H(9B)  | 109.5           |
| H(4A)-C(4)-H(4B)  | 108.7           | H(9A)-C(9)-H(9B) | 109.5           |
| C(4)-C(5)-C(6)    | 113.44(15)      | C(8)-C(9)-H(9C)  | 109.5           |
| C(4)-C(5)-H(5A)   | 108.9           | H(9A)-C(9)-H(9C) | 109.5           |
| C(6)-C(5)-H(5A)   | 108.9           | H(9B)-C(9)-H(9C) | 109.5           |
| C(4)-C(5)-H(5B)   | 108.9           | O(4)-C(10)-C(3)  | 124.63(18)      |
| C(6)-C(5)-H(5B)   | 108.9           | O(4)-C(10)-H(10) | 117.7           |
| H(5A)-C(5)-H(5B)  | 107.7           | C(3)-C(10)-H(10) | 117.7           |
| C(7)-C(6)-C(5)    | 113.95(15)      |                  |                 |

**Table S4** Hydrogen bonds for FPB [Å and deg.].

| D-H...A             | d(D-H)[Å] | d(H...A) [Å] | d(D...A) [Å] | <(DHA) |
|---------------------|-----------|--------------|--------------|--------|
| C(4)-H(4B)...O(3)#2 | 0.97      | 2.653        | 3.453(2)     | 140.1  |
| C(8)-H(8A)...O(4)#2 | 0.97      | 2.576        | 3.505(3)     | 162.7  |
